# Supplementary material for: Comparative systematics and phylogeography of Quercus Section Cerris in western Eurasia: inferences from plastid and nuclear DNA variation
Source: PeerJ. 2018 Oct 17;6:e5793. doi: 10.7717/peerj.5793 (PMC6195796; doi:10.7717/peerj.5793)
Supplement: File S3 — This list reports all the identical 5S-IGS cloned sequences in the investigated dataset. Colors according to species list. [file peerj-06-5793-s003.xlsx]

## Sheet: Sheet1
				Supplemental File S3 - Identical 5S-IGS cloned sequences
1	af0502TN	af0604TN	are exactly identical		Q. afares
2	af0502TN	af0701TN	are exactly identical
3	af0502TN	af0705TN	are exactly identical		Q. brantii
4	af0502TN	af0902TN	are exactly identical
5	br0201TR	br0203TR	are exactly identical		Q. cerris
6	br0202TR	br0204TR	are exactly identical
7	br0301TR	su5302I	are exactly identical		Q. crenata
8	br0302TR	ce1602TR	are exactly identical
9	br0302TR	ce3801IS	are exactly identical		Q. ithaburensis
10	br0302TR	ce4503I	are exactly identical
11	br0302TR	lk0305IS	are exactly identical		Q. libani
12	br0401TR	br0403TR	are exactly identical
13	br0401TR	br0405TR	are exactly identical		Q. look
14	br0401TR	br0501TR	are exactly identical
15	br0401TR	br0503iTR	are exactly identical		Q. macrolepis
16	br0401TR	br0504TR	are exactly identical
17	br0602KR	br0603KR	are exactly identical		Q. suber
18	br0604KR	br0605KR	are exactly identical
19	ce0109I	ce1301I	are exactly identical		Q. trojana
20	ce0109I	ce3904HU	are exactly identical
21	ce0201A	ce0207A	are exactly identical		Q. trojana hybrid
22	ce0201A	ce4701I	are exactly identical
23	ce0201A	ce4705I	are exactly identical
24	ce0201A	ce5402I	are exactly identical
25	ce0701GR	ce3009TR	are exactly identical
26	ce0701GR	ce4304SB	are exactly identical
27	ce0902I	ce5002I	are exactly identical
28	ce1207I	ce1208I	are exactly identical
29	ce1403I	ce4901HR	are exactly identical
30	ce1503I	tj4502TR	are exactly identical
31	ce2105TR	ce3504TR	are exactly identical
32	ce2105TR	ce5101RO	are exactly identical
33	ce2105TR	ce5102RO	are exactly identical
34	ce3008TR	ce3201TR	are exactly identical
35	ce3302TR	ce3305TR	are exactly identical
36	ce3303TR	ce4101LB	are exactly identical
37	ce3303TR	ce4103LB	are exactly identical
38	ce4204A	ce4205A	are exactly identical
39	ce4302SB	su3705HR	are exactly identical
40	ce4804I	ce4805I	are exactly identical
41	ce5003I	ce5004I	are exactly identical
42	ce5003I	ce5005I	are exactly identical
43	ce5204HR	ce5205HR	are exactly identical
44	cr0101I	cr0103I	are exactly identical
45	cr0101I	cr0205I	are exactly identical
46	cr0101I	su0101I	are exactly identical
47	cr0101I	su0103I	are exactly identical
48	cr0101I	su0104I	are exactly identical
49	cr0101I	su0203I	are exactly identical
50	cr0101I	su0302I	are exactly identical
51	cr0101I	su0403I	are exactly identical
52	cr0101I	su0404I	are exactly identical
53	cr0101I	su0405I	are exactly identical
54	cr0101I	su0602E	are exactly identical
55	cr0101I	su0603E	are exactly identical
56	cr0101I	su0604E	are exactly identical
57	cr0101I	su0701E	are exactly identical
58	cr0101I	su0903E	are exactly identical
59	cr0101I	su1007E	are exactly identical
60	cr0101I	su1301E	are exactly identical
61	cr0101I	su1302E	are exactly identical
62	cr0101I	su1304E	are exactly identical
63	cr0101I	su1305E	are exactly identical
64	cr0101I	su2204MA	are exactly identical
65	cr0101I	su2801MA	are exactly identical
66	cr0101I	su2802MA	are exactly identical
67	cr0101I	su3001P	are exactly identical
68	cr0101I	su3103P	are exactly identical
69	cr0101I	su3303P	are exactly identical
70	cr0101I	su3304P	are exactly identical
71	cr0101I	su3403P	are exactly identical
72	cr0101I	su3404P	are exactly identical
73	cr0101I	su3405P	are exactly identical
74	cr0101I	su3502P	are exactly identical
75	cr0101I	su3605P	are exactly identical
76	cr0101I	su3801I	are exactly identical
77	cr0101I	su3802I	are exactly identical
78	cr0101I	su3803I	are exactly identical
79	cr0101I	su4001F	are exactly identical
80	cr0101I	su4003F	are exactly identical
81	cr0101I	su4101ALG	are exactly identical
82	cr0101I	su4105ALG	are exactly identical
83	cr0101I	su4301I	are exactly identical
84	cr0101I	su4306I	are exactly identical
85	cr0101I	su4402I	are exactly identical
86	cr0101I	su4501I	are exactly identical
87	cr0101I	su4502I	are exactly identical
88	cr0101I	su4504I	are exactly identical
89	cr0101I	su4506I	are exactly identical
90	cr0101I	su4507I	are exactly identical
91	cr0101I	su4603I	are exactly identical
92	cr0101I	su4604I	are exactly identical
93	cr0101I	su4605I	are exactly identical
94	cr0101I	su4703I	are exactly identical
95	cr0101I	su4704I	are exactly identical
96	cr0101I	su4706I	are exactly identical
97	cr0101I	su4802TN	are exactly identical
98	cr0101I	su4804TN	are exactly identical
99	cr0101I	su4903TN	are exactly identical
100	cr0101I	su5002F	are exactly identical
101	cr0101I	su5104F	are exactly identical
102	cr0101I	su5202I	are exactly identical
103	cr0101I	su5206I	are exactly identical
104	cr0101I	su5410I	are exactly identical
105	cr0302I	su2804MA	are exactly identical
106	cr0302I	su3104P	are exactly identical
107	cr0302I	su3603P	are exactly identical
108	cr0303I	su3105P	are exactly identical
109	cr0403SLO	cr0404SLO	are exactly identical
110	cr0506HR	su0704E	are exactly identical
111	cr0506HR	su1013E	are exactly identical
112	it0201IS	it0202IS	are exactly identical
113	it0304IS	it0305IS	are exactly identical
114	it0504IS	it0505IS	are exactly identical
115	li0204TR	li0403TR	are exactly identical
116	li0204TR	li0404TR	are exactly identical
117	li0204TR	li0405TR	are exactly identical
118	lk0202IS	lk0204IS	are exactly identical
119	lk0202IS	lk0205IS	are exactly identical
120	ml0103I	ml0203I	are exactly identical
121	ml0103I	ml0401I	are exactly identical
122	ml0103I	ml0510I	are exactly identical
123	ml0103I	ml0511I	are exactly identical
124	ml0103I	ml1703TR	are exactly identical
125	ml0103I	ml1706TR	are exactly identical
126	ml0103I	ml1905TR	are exactly identical
127	ml0103I	ml1906TR	are exactly identical
128	ml0103I	ml2311TR	are exactly identical
129	ml0107I	ml0108I	are exactly identical
130	ml0107I	ml1202GR	are exactly identical
131	ml0107I	ml1206GR	are exactly identical
132	ml0107I	ml1702TR	are exactly identical
133	ml0107I	ml1701TR	are exactly identical
134	ml0201I	ml0204I	are exactly identical
135	ml0201I	ml0206I	are exactly identical
136	ml0205I	ml0209I	are exactly identical
137	ml0208I	ml2312TR	are exactly identical
138	ml0302I	ml0304I	are exactly identical
139	ml0302I	ml0308I	are exactly identical
140	ml0302I	ml0410I	are exactly identical
141	ml0302I	ml1903TR	are exactly identical
142	ml0302I	ml2306TR	are exactly identical
143	ml0302I	ml2310TR	are exactly identical
144	ml0305I	ml0307I	are exactly identical
145	ml0305I	ml0405I	are exactly identical
146	ml0305I	ml0408I	are exactly identical
147	ml0402I	ml0406I	are exactly identical
148	ml0504I	ml0505I	are exactly identical
149	ml0601I	ml0602I	are exactly identical
150	ml0606I	ml0701GR	are exactly identical
151	ml0606I	ml0702GR	are exactly identical
152	ml0606I	ml1304GR	are exactly identical
153	ml0606I	ml1501TR	are exactly identical
154	ml0606I	ml1503TR	are exactly identical
155	ml0606I	ml1504TR	are exactly identical
156	ml0606I	ml1507TR	are exactly identical
157	ml0606I	ml1508TR	are exactly identical
158	ml0703GR	ml0704GR	are exactly identical
159	ml0705GR	ml0706GR	are exactly identical
160	ml0707GR	ml0708GR	are exactly identical
161	ml0801GR	ml0804GR	are exactly identical
162	ml0801GR	ml0805GR	are exactly identical
163	ml0802GR	ml2705IS	are exactly identical
164	ml0802GR	ml2901AL	are exactly identical
165	ml1001GR	ml1002GR	are exactly identical
166	ml1003GR	ml1004GR	are exactly identical
167	ml1005GR	ml1006GR	are exactly identical
168	ml1007GR	ml1008GR	are exactly identical
169	ml1101GR	ml1105GR	are exactly identical
170	ml1102GR	ml1801TR	are exactly identical
171	ml1102GR	ml1802TR	are exactly identical
172	ml1102GR	ml1804TR	are exactly identical
173	ml1203GR	ml1204GR	are exactly identical
174	ml1502TR	ml1505TR	are exactly identical
175	ml2001TR	ml2002TR	are exactly identical
176	ml2004TR	ml2104TR	are exactly identical
177	ml2101TR	ml2105TR	are exactly identical
178	ml3001GR	ml3011GR	are exactly identical
179	su2203MA	su3003P	are exactly identical
180	su3604P	su3902I	are exactly identical
181	su3905I	su4302I	are exactly identical
182	su4004F	su4005F	are exactly identical
183	su4305I	su4805TN	are exactly identical
184	su4404I	su4405I	are exactly identical
185	tj0304TR	tj0506TR	are exactly identical
186	tj0601TR	tj0603TR	are exactly identical
187	tj0601TR	tj3504TR	are exactly identical
188	tj0803I	tj1202I	are exactly identical
189	tj0803I	tj1205I	are exactly identical
190	tj0803I	tj1209I	are exactly identical
191	tj1002I	tj1008I	are exactly identical
192	tj1002I	tj1206I	are exactly identical
193	tj1002I	tj1208I	are exactly identical
194	tj1002I	tj1803GR	are exactly identical
195	tj1002I	tj2002GR	are exactly identical
196	tj1002I	tj2803I	are exactly identical
197	tj1002I	tj3201I	are exactly identical
198	tj1002I	tj3204I	are exactly identical
199	tj1003I	tj1007I	are exactly identical
200	tj1003I	tj2404I	are exactly identical
201	tj1003I	tj2605I	are exactly identical
202	tj1003I	tj3102I	are exactly identical
203	tj1201I	tj1802GR	are exactly identical
204	tj1201I	tj3203I	are exactly identical
205	tj1602TR	tj1603TR	are exactly identical
206	tj1701GR	tj1704GR	are exactly identical
207	tj1701GR	tj1705GR	are exactly identical
208	tj1703GR	tj1706GR	are exactly identical
209	tj1703GR	tj2101GR	are exactly identical
210	tj1703GR	tj2105GR	are exactly identical
211	tj1703GR	tj2403I	are exactly identical
212	tj1703GR	tj3005I	are exactly identical
213	tj1804GR	tj3202I	are exactly identical
214	tj2202GR	tj2203GR	are exactly identical
215	tj2202GR	tj2205GR	are exactly identical
216	tj3004I	tj3101I	are exactly identical
217	tj3901TR	tj3904TR	are exactly identical
218	tj3902TR	tj3905TR	are exactly identical
219	tj4202TR	tj4203TR	are exactly identical
